# Supplementary material for: Spatial patterns of tumour growth impact clonal diversification in a computational model and the TRACERx Renal study
Source: PubMed Central journal article supplement (PMC8752443; doi:10.1038/s41559-021-01586-x), 2021-12-23

---

**Supplementary information**

---

**Spatial patterns of tumour growth impact clonal diversification in a computational model and the TRACERx Renal study**

---

In the format provided by the authors and unedited

1 Supplementary Information Flat Files for:

2

3 **Title:**

4 Spatial patterns of tumour growth impact clonal diversification

5 **Authors:**

6

7 Xiao Fu<sup>1,2\*</sup>, Yue Zhao<sup>3,4,5,6\*</sup>, Jose I. Lopez<sup>7</sup>, Andrew Rowan<sup>3</sup>, Lewis Au<sup>8,9</sup>, Annika Fendler<sup>8</sup>,  
8 Steve Hazell<sup>10</sup>, Hang Xu<sup>3,11</sup>, Stuart Horswell<sup>12</sup>, Scott T. C. Shepherd<sup>8,9</sup>, Charlotte E. Spencer<sup>8,9</sup>,  
9 Lavinia Spain<sup>8,9</sup>, Fiona Byrne<sup>8</sup>, Gordon Stamp<sup>13</sup>, Tim O'Brien<sup>14</sup>, David Nicol<sup>15</sup>, Marcellus  
10 Augustine<sup>3</sup>, Ashish Chandra<sup>16</sup>, Sarah Rudman<sup>17</sup>, Antonia Toncheva<sup>18</sup>, Andrew J. S. Furness<sup>8,9</sup>,  
11 Lisa Pickering<sup>9</sup>, Santosh Kumar<sup>19</sup>, Dow-Mu Koh<sup>19,20</sup>, Christina Messiou<sup>19,20</sup>, Derfel ap  
12 Dafydd<sup>20</sup>, Matthew R. Orton<sup>21</sup>, Simon J. Doran<sup>19</sup>, James Larkin<sup>9</sup>, Charles Swanton<sup>3,4,22</sup>, Erik  
13 Sahai<sup>2#</sup>, Kevin Litchfield<sup>3,4#</sup>, Samra Turajlic<sup>8,9#</sup> on behalf of the TRACERx Renal Consortium,  
14 Paul A. Bates<sup>1#</sup>

15

16 1. Biomolecular Modelling Laboratory, The Francis Crick Institute, 1 Midland Rd, London  
17 NW1 1AT, UK

18 2. Tumour Cell Biology Laboratory, The Francis Crick Institute, 1 Midland Rd, London NW1  
19 1AT, UK

20 3. Cancer Evolution and Genome Instability Laboratory, The Francis Crick Institute, 1 Midland  
21 Rd, London NW1 1AT, UK

- 1 4. Cancer Research UK Lung Cancer Centre of Excellence, University College London Cancer  
2 Institute, Paul O’Gorman Building, 72 Huntley Street, London, WC1E 6BT, UK
- 3 5. Department of Thoracic Surgery, Fudan University Shanghai Cancer Center, Shanghai,  
4 China. 200032.
- 5 6. Department of Oncology, Shanghai Medical College, Fudan University, Shanghai,  
6 China. 200032.
- 7 7. Department of Pathology, Cruces University Hospital, Biocruces-Bizkaia Institute, 48903  
8 Barakaldo, Bizkaia, Spain
- 9 8. Cancer Dynamics Laboratory, The Francis Crick Institute, 1 Midland Rd, London NW1  
10 1AT, UK
- 11 9. Renal and Skin Units, The Royal Marsden Hospital, London, SW3 6JJ, UK
- 12 10. Department of Pathology, the Royal Marsden NHS Foundation Trust, London SW3 6JJ,  
13 UK
- 14 11. Stanford Cancer Institute, Stanford University School of Medicine, Stanford, California,  
15 US
- 16 12. Department of Bioinformatics and Biostatistics, The Francis Crick Institute, 1 Midland Rd,  
17 London NW1 1AT, UK
- 18 13. Experimental Histopathology Laboratory, The Francis Crick Institute, London NW1 1AT,  
19 UK
- 20 14. Urology Centre, Guy’s and St. Thomas’ NHS Foundation Trust, London SE1 9RT, UK
- 21 15. Department of Urology, the Royal Marsden NHS Foundation Trust, London SW3 6JJ, UK

- 1 16. Department of Pathology, Guy's and St. Thomas NHS Foundation Trust, London SE1 9RT,
- 2 UK
- 3 17. Department of Medical Oncology, Guy's and St. Thomas' NHS Foundation Trust, London
- 4 SE1 9RT, UK
- 5 18. Biobank, Guy's and St. Thomas' NHS Foundation Trust, London SE1 7EH, UK
- 6 19. Division of Radiotherapy and Imaging, Institute of Cancer Research, 15 Cotswold
- 7 Road, Sutton, Surrey, SM2 5NG
- 8 20. Department of Radiology, Royal Marsden Hospital, Fulham Rd, London, SW3 6JJ
- 9 21. Artificial Intelligence Imaging Hub, Royal Marsden NHS Foundation Trust, Sutton, UK
- 10 22. Department of Medical Oncology, University College London Hospitals, 235 Euston Rd,
- 11 Fitzrovia, London, NW1 2BU, UK
- 12

# 1 Table of Contents

|    |                                                                                                    |           |
|----|----------------------------------------------------------------------------------------------------|-----------|
| 2  | <b>TITLE:</b> .....                                                                                | <b>1</b>  |
| 3  | <b>AUTHORS:</b> .....                                                                              | <b>1</b>  |
| 4  | <b>SUPPLEMENTARY NOTES</b> .....                                                                   | <b>5</b>  |
| 5  | <b>SUPPLEMENTARY NOTE 1.</b> ADDITIVE MODEL OF DRIVER ADVANTAGES. ....                             | 5         |
| 6  | <b>SUPPLEMENTARY NOTE 2.</b> GROWTH MODES IMPACT THE SPATIAL PATTERNS OF FITNESS. ....             | 6         |
| 7  | <b>SUPPLEMENTARY NOTE 3.</b> SPATIAL HOMOGENISATION OF SUBCLONES ABOLISHES CHARACTERISTIC          |           |
| 8  | PATTERNS OF MICRODIVERSITY HOTSPOTS. ....                                                          | 7         |
| 9  | <b>SUPPLEMENTARY NOTE 4.</b> SPATIAL FEATURES OF MICRODIVERSITY IN AN EXPANDED SET OF GROWTH       |           |
| 10 | MODELS.....                                                                                        | 8         |
| 11 | <b>SUPPLEMENTARY NOTE 5.</b> SCALING FEATURES OF MICRODIVERSITY IN ccRCC TUMOURS ARE ASSOCIATED    |           |
| 12 | WITH CLINICAL BEHAVIOURS.....                                                                      | 9         |
| 13 | <b>SUPPLEMENTARY NOTE 6.</b> FREQUENCY OF PARALLEL MUTATIONAL EVENTS IN ccRCCs.....                | 10        |
| 14 | <b>SUPPLEMENTARY NOTE 7.</b> EVOLUTIONARY REPLAY <i>IN SILICO</i> SUGGESTS THAT BUDDING MAY INFORM |           |
| 15 | EVOLUTIONARY TRAJECTORIES .....                                                                    | 11        |
| 16 | <b>SUPPLEMENTARY NOTE 8.</b> CONSIDERATIONS FOR THE SELECTION OF DRIVER ACQUISITION RATES IN THE   |           |
| 17 | COARSE-GRAINED MODEL .....                                                                         | 12        |
| 18 | <b>SUPPLEMENTARY FIGURE LEGENDS</b> .....                                                          | <b>14</b> |
| 19 | <b>SUPPLEMENTARY FIGURE 1.</b> CLONAL DIVERSITY IN MODELS WITH SMALL DRIVER ACQUISITION            |           |
| 20 | PROBABILITIES ( $p_{driver}$ ). ....                                                               | 14        |
| 21 | <b>SUPPLEMENTARY FIGURE 2.</b> CLONAL DIVERSITY IN MODELS WITH ZERO OR SMALL SELECTIVE COEFFICIENT |           |
| 22 | ( $s$ ). ....                                                                                      | 14        |
| 23 | <b>SUPPLEMENTARY FIGURE 3.</b> REPRESENTATIVE EXAMPLES OF SPATIAL MAPS OF SUBCLONES AND FITNESS    |           |
| 24 | UNDER VARIOUS MODEL CONDITIONS.....                                                                | 15        |
| 25 | <b>SUPPLEMENTARY FIGURE 4.</b> SPATIAL FEATURES OF TUMOUR FITNESS IN MODELS WITH SATURATED DRIVER  |           |
| 26 | ADVANTAGES. ....                                                                                   | 15        |
| 27 | <b>SUPPLEMENTARY FIGURE 5.</b> SPATIAL FEATURES OF TUMOUR FITNESS IN MODELS WITH ADDITIVE DRIVER   |           |
| 28 | ADVANTAGES. ....                                                                                   | 16        |
| 29 | <b>SUPPLEMENTARY FIGURE 6.</b> QUANTILE-QUANTILE (Q-Q) PLOTS OF OBSERVED DISTRIBUTION OF           |           |
| 30 | MICRODIVERSITY HOTSPOTS VERSUS THE FITTED POWER LAW DISTRIBUTION. ....                             | 16        |
| 31 | <b>SUPPLEMENTARY FIGURE 7.</b> ASSOCIATION BETWEEN SPATIAL FEATURES OF MICRODIVERSITY AND CLINICAL |           |
| 32 | BEHAVIOUR. ....                                                                                    | 17        |
| 33 | <b>SUPPLEMENTARY FIGURE 8.</b> PHOTOGRAPH AND HISTOLOGICAL IMAGES OF REPRESENTATIVE CASE K156....  | 17        |
| 34 |                                                                                                    |           |

# 1 Supplementary Notes

## 2 **Supplementary Note 1. Additive model of driver advantages.**

3 In the main text, we focused on presenting a saturated model of driver advantages, assuming  
4 that each of the ccRCC drivers endowed a tumour voxel with one of the three possible levels  
5 of growth probabilities and that, once acquiring one of the strongest drivers, the growth  
6 probability of a tumour voxel became saturated.

7 Separately, we evaluated an additive model of driver advantages (**Extended Data Figure 2a**,  
8 see Methods), assuming that acquisition of each ccRCC driver added to the growth  
9 probability of a tumour voxel and the relative selective advantages of drivers were defined  
10 according to their association with Ki67 score. Three scenarios were considered to reflect  
11 increasing amount of growth probabilities added by drivers on average (**Extended Data**  
12 **Figure 2b**).

13 For a qualitative comparison between two models of driver advantages, we focused on  
14 examining the clonal diversity observed at the end of simulation for conditions of driver  
15 acquisition probability highlighted for Surface Growth model ( $p_{driver} = 2 \times 10^{-4}$ ) and for  
16 Volume Growth model ( $p_{driver} = 1 \times 10^{-3}$ ) in the Main Text (**Main Figure 2**). Consistent  
17 with the finding discussed in the main text, for all of these scenarios, Volume Growth models  
18 (**Extended Data Figure 2c**), even with a greater  $p_{driver}$  employed, resulted in less extensive  
19 subclonal diversification than Surface Growth models (**Extended Data Figure 2d**). In both  
20 growth models, greater average growth probabilities added by drivers led to more extensive  
21 diversification. Additionally, in the Volume Growth model, clonal proportions across  
22 repeated simulations with the second scenario (i.e.,  $\min(s_k) = 0.015$ ,  $\Delta s_k = 0.005$ ) were  
23 similar to those highlighted in the Main Text (**Main Figure 2c (ii)**), suggesting a minimal

1 impact of the implementation of selective advantage on the observed clonal diversity at the  
2 end of simulation. In contrast, in the Surface Growth model, repeated simulations with the  
3 second scenario displayed a greater extent of subclonal diversification (i.e., smaller size of  
4 largest subclone “subclone 1”) than those highlighted in the Main Text (**Main Figure 2c**  
5 **(iii)**), suggesting that Surface Growth mode could be more sensitive to the implementation of  
6 selective advantage conferred by drivers, with greater extent of diversification in additive  
7 model of driver advantages.

8

## 9 **Supplementary Note 2. Growth modes impact the spatial patterns of fitness.**

10 In the main text, we presented the impact of growth modes on spatial patterns of fitness  
11 (**Main Figure 2**). Here, we discuss this finding in greater depth. In the model, we defined the  
12 “fitness” of a tumour voxel as its growth probability dependent on the list of drivers it  
13 harbours (See Methods). Then the fitness of each tumour voxel within a tumour slice was  
14 mapped (**Supplementary Figure 3**). In Surface Growth models with saturated driver  
15 advantages, bulging regions along the tumour contour were represented by outgrowing  
16 subclones with much greater fitness than adjacent tumour areas, while in those with additive  
17 driver advantages, many subclones, with small differences in fitness, coexisted at the tumour  
18 frontier. By contrast, Volume Growth models with saturated driver advantages showed few  
19 subclones with high fitness, while those with additive driver advantages generally lacked  
20 subclones with high fitness. With the incorporation of necrosis, less fit clones became extinct  
21 while fitter clones were selected to dominate at the tumour centre, in keeping with our recent  
22 study (Zhao Y., *et al. Nat. Ecol. Evol.* (2021)).

23

1 The spatial features of fitness were quantitatively analysed by taking samples from the  
2 simulated tumours (see Methods; **Supplementary Figure 4-5**). For Volume Growth models,  
3 the presence of necrosis generally enhanced the fitness in both tumour margin and centre,  
4 with a pronounced effect in models with implementation of saturated driver advantage. For  
5 Surface Growth models, the tumour margin showed high fitness and was not impacted by  
6 necrosis; however, the fitness of the tumour centre was dramatically enhanced when necrosis  
7 was incorporated.

8 Collectively, we found that necrosis in the simulated tumours could lead to the selection of  
9 fitter subclones with greater growth probabilities in the tumour centre, consistent with our  
10 experimental observation that aggressive subclones were enriched in the tumour centre (Zhao  
11 Y., *et al. Nat. Ecol. Evol.* (2021)).

12

### 13 **Supplementary Note 3. Spatial homogenisation of subclones abolishes** 14 **characteristic patterns of microdiversity hotspots.**

15 In the main text, we presented that microdiversity hotspots were increasingly frequent  
16 towards the tumour margin and the cumulative probability distribution follows power law  
17 scaling (**Main Figure 3**). Importantly, the observed power law distribution exhibited an  
18 exponent much greater than the value as would be expected from a uniform spatial  
19 distribution in a circular area in two dimensions (2D) (**Extended Data Figure 5a-b**),  
20 suggesting a preferential enrichment of microdiversity hotspots at the margin.

21 Here, we present additional analyses supporting that the spatial organisation of subclones  
22 underlied the observed characteristic scaling patterns of microdiversity hotspots. Briefly, we  
23 spatially homogenised the patterns of subclones within the a tumour slice. Importantly, the  
24 proportions of subclones in a tumour slice were kept unchanged but the spatial organisation



1 of subclones was entirely lost (**Extended Data Figure 5c-d**). Interestingly, this spatial  
2 homogenisation was sufficient to reduce the scaling exponent to approximately 2, as would  
3 be expected via random sampling of spots from a 2D circular area (**Extended Data Figure**  
4 **5e-f**). Collectively, these data together with analyses presented in the main text (**Main Figure**  
5 **4**) suggested the importance of the emergent spatial organisation of subclones, as a  
6 consequence of tumour growth in a spatial context, in shaping the scaling patterns of  
7 microdiversity hotspots.

8

9 **Supplementary Note 4. Spatial features of microdiversity in an expanded set of**  
10 **growth models.**

11 In the main text, we presented the spatial patterns of microdiversity in Surface and Volume  
12 Growth models with saturated model of driver advantages in the absence of necrosis (**Main**  
13 **Figure 3**).

14 Here, we further discuss the spatial patterns of microdiversity in an expanded set of growth  
15 models, considering the implementation of additive driver advantages and incorporation of  
16 necrosis (see Methods; **Extended Data Figure 6**). Models with different implementations of  
17 driver advantages showed similar profiles of probability density distributions characterising  
18 the spatial locations of microdiversity hotspots, in the absence of necrosis. With necrosis  
19 incorporated, microdiversity hotspots were largely enriched in the non-necrotic tumour  
20 margin. However, Surface Growth models, especially those with saturated driver advantages,  
21 clearly showed a bi-modal probability density distribution indicating the enrichment of  
22 additional microdiversity hotspots at the necrotic tumour centre. This finding was in  
23 accordance with our recent finding that harsher environments at the tumour interior could

1 select aggressive clones and potentiate continual subclonal diversification (Zhao Y. *et al. Nat.*  
2 *Ecol. Evol.* (2021)).

3

4 **Supplementary Note 5. Scaling features of microdiversity in ccRCC tumours are**  
5 **associated with clinical behaviours.**

6 In the main text, we presented that, corroborating the modelling observations, 606 regions  
7 with at least 2 clones from 54 tumours, defined as microdiversity hotspots in the tumour data,  
8 were increasingly frequent towards the tumour margin (**Main Figure 3**). Furthermore, the  
9 cumulative probability distribution characterising the spatial locations of these regions  
10 followed a power law distribution, consistent with the model, and the exponent of the power  
11 law was associated with clinical behaviours, based on previously published annotations  
12 (Turajlic S., *et al. Cell* (2018), **Supplementary Table 2**).

13 Here, we present the analysis that established this association. When the 54 tumours were  
14 split into two subsets according to whether the patient has relapsed (270 tumour regions) or  
15 not (336 tumour regions), the subset where the patient has relapsed showed a significantly  
16 steeper gradient of spatially distributed microdiversity hotspots (i.e., larger power law  
17 exponent) than the subset where the patient hasn't (**Supplementary Figure 7**). Additionally,  
18 when the 54 tumours are split into three subsets according to the rates of disease progression  
19 – attenuated progression (265 tumour regions), rapid progression (65 tumour regions), and no  
20 progression (276 tumour regions), the subset with attenuated progression showed the steepest  
21 gradient of spatial distribution of microdiversity hotspots, while subsets with either lack of or  
22 rapid progression showed shallow gradient (**Supplementary Figure 7**).

23 These data suggested that tumours mapped to a poorer clinical outcome are typically  
24 associated with a steeper spatial distribution of microdiversity hotspots and enrichment  
25 towards the tumour margin. Furthermore, together with the macrodiversity and

1 microdiversity analysis in the simulated tumours (**Main Figures 2-3**), we conclude that  
2 different growth modes correspond to tumours with distinct patterns of evolution and  
3 progression. Surface Growth models, showing enrichment microdiversity hotspots towards  
4 the margin, are mapped to tumours with branched evolution and attenuated progression;  
5 Volume Growth models, showing more uniform distribution of microdiversity hospots, are  
6 mapped to either indolent tumours with lack of evolution and progression or aggression  
7 tumours with punctuated evolution and rapid progression.

8

### 9 **Supplementary Note 6. Frequency of parallel mutational events in ccRCCs**

10 In the main text, we presented the spatial patterns of parallel mutational events with limited  
11 clonal expansion (**Main Figure 4**). Here, we also briefly report the frequency of parallel  
12 evolution events in the cohort.

13 The observation of parallel evolution in ccRCCs was reported previously (Turajlic S., *et al.*  
14 *Cell* (2018)). Due to the limits of spatial sampling and sequencing, parallel gene mutations  
15 were detected in 28 out of 66 tumours (**Supplementary Table 3**). A total of 71 of 114  
16 parallel events in 18 tumours were alterations in known ccRCC drivers, including *ARID1A*,  
17 *BAP1*, *KDM5C*, *PBRM1*, *PTEN*, *SETD2*, and *VHL*. Among these drivers, parallel evolution  
18 of alterations in *PBRM1*, *SETD2*, and *BAP1* were most frequent, in 6, 5, and 4 tumours,  
19 respectively. Consistent with previous observations (Turajlic S., *et al. Cell* (2018)), parallel  
20 mutational events could span a variable number of patient tumour (PT) regions. For example,  
21 in K520 (**Main Figure 5**), multiple parallel events of *PBRM1* mutations co-existed, with one  
22 highly prevalent event spanning more than 10 PT regions and additional events displaying  
23 less clonal expansion.

1 **Supplementary Note 7. Evolutionary replay *in silico* suggests that budding may**  
2 **inform evolutionary trajectories**

3 In the main text, we presented that the appearance of budding structures in Surface Growth  
4 models preceded the subsequent subclonal outgrowth and diversification (**Main Figure 5**).  
5 This suggested that the evolutionary trajectories could become more constrained after the the  
6 emergence of budding structures. Here, we explored this by performing evolutionary replay  
7 simulations.

8 Specifically, an *in-silico* tumour under Surface Growth was prepared for evolutionary replay  
9 (**Extended Data Figure 9, Extended Data Figure 10a**). Using the historical state of this  
10 tumour at a particular time point as a common starting state, 50 new *in-silico* tumours were  
11 simulated (**Extended Data Figure 10b**). While re-grown tumours starting from earlier  
12 historical states displayed markedly divergent patterns of subclones in the end (**Extended**  
13 **Data Figure 10c (i)**), those grown from historical states collected from later stages,  
14 especially after the emergence of the budding structure, appeared very similar to the original  
15 pattern of subclones (**Extended Data Figure 10c (ii-iv)**). Quantitatively, this was evidenced  
16 by a decreasing divergence in Shannon diversity at the end of simulations after evolutionary  
17 replay as a function of the size of the starting tumour state (**Extended Data Figure 10d**).  
18 Similarly, this trend of decreasing divergence was noted in *in-silico* tumours under Surface  
19 Growth with a greater probability of driver acquisition (**Extended Data Figure 10e**) as well  
20 as those under Volume Growth (**Extended Data Figure 10f**). This finding suggested that  
21 budding structures in a tumour under Surface Growth could indicate future evolutionary  
22 trajectories.

1 **Supplementary Note 8. Considerations for the selection of driver acquisition rates in**  
2 **the coarse-grained model**

3 For a number of reasons, we believe that choosing an exact driver acquisition rate in this  
4 coarse-grained model is fundamentally difficult and may be unnecessary for our aim of study:

5 Firstly, and most importantly, employing a mutation rate based on a “macroscopic” metric of  
6 evolutionary outcome via inference (e.g., as in Williams et al. (2016) Nature Genetics) may  
7 well lead to the risk of generating circular arguments in our study. As discussed in other parts  
8 of the manuscript (e.g., **Main Figure 5, Extended Data Figure 8**), Volume Growth and  
9 Surface Growth models show very different time scales of growth and spatial extent and  
10 uniformity of driver accumulation. These two models would apparently differ in the inferred  
11 mutation rates given the same “macroscopic” metric. For example, to achieve the same  
12 Shannon diversity at the end, it requires a much higher driver acquisition rate for Volume  
13 Growth than for Surface Growth (**Main Figure 2e**). Thus, we chose to contrast two models  
14 always at the same driver acquisition rate, for a range of values, and with the same  
15 implementation of driver advantages.

16 Secondly, a mapping relationship from mutation rate per cell division to the effective  
17 mutation rate at the tumour voxel level is lacking and would be an interesting question for  
18 future study. With our coarse-grained approach, we focused on large-scale clonal dynamics  
19 and therefore neglected finer-scale clonal dynamics within each tumour voxel as well as the  
20 impact of cell migratory dynamics, which will be needed for establishing a mapping  
21 relationship. Recent work started to shed lights on this question by simulating clonal  
22 dynamics under domains with varying sizes and found that the spatial constraint could  
23 influence the type of realised evolution. i.e., neutral vs. Darwinian evolution (West et al  
24 Nature Communications (2021)).

1 Thirdly, the ways to collecting samples could make inference of evolutionary parameters  
2 difficult. As demonstrated in Chkhaidze et al PLoS Comput Biol. (2019), spatial tumour  
3 growth and specific sampling procedures could influence the inferred type of evolution.  
4 Given that in the TRACERx Renal cohort, the number and spatial distribution of regional  
5 samples vary among tumours, it's difficult to dissect the difference in mutation rates from  
6 these factors.

7 With all the considerations above, we decided to examine our model outputs across a range  
8 of driver acquisition rates and evaluate rates that range from very small value  
9 (**Supplementary Figure 1**) where both growth models lack macrodiversity to large value  
10 where both growth models show high macrodiversity. While this choice doesn't inform us of  
11 the mutation rates in ccRCCs, which is not the focus of our study, we are able to consistently  
12 contrast outcomes in clonal diversification between Volume Growth and Surface Growth  
13 models at the same driver acquisition rate, across a wide range of values.

## 1 Supplementary Figure Legends

2

### 3 **Supplementary Figure 1.** Clonal diversity in models with small driver acquisition 4 probabilities ( $p_{driver}$ ).

5 (a-b) Whole-tumour CCF of parental and largest subclones in *in-silico* tumours under Surface  
6 Growth (a) and Volume Growth (b), respectively, under the indicated parameter conditions.

7 “Parental (3p loss, *VHL*)” clone is shown along with up to five subclones with a whole-  
8 tumour CCF of 0.01 or higher. All remaining subclones are represented in the “other” group.

9 (d) Whole-tumour CCF of parental clone in *in-silico* tumours under Volume Growth and  
10 Surface Growth with varying driver acquisition probabilities. N = 100 for each condition.

11 (e) Shannon diversity index in *in-silico* tumours under Volume Growth and Surface Growth  
12 with varying driver acquisition probabilities. N = 100 for each condition.

13 Statistical annotations in (d-e) reflect two-sided Wilcoxon tests: “\*\*\*\*\*” indicates  $P \leq$   
14 0.0001.

15

### 16 **Supplementary Figure 2.** Clonal diversity in models with zero or small selective 17 coefficient ( $s$ ).

18 (a-b) Reproduced from **Main Figure 2a-b** for reference to parameter domains. (a) Schematic  
19 figure for the whole-tumour analysis of clonal diversity. (b) Heatmap showing the average  
20 number of clones (i.e., parental clone and subclones) with respect to driver acquisition  
21 probability and selective coefficient in the Volume Growth (i) and Surface Growth (ii) models.

1 The average is calculated from 50 *in-silico* tumours per parameter condition. Clones with a  
2 whole-tumour CCF of at least 0.05 are counted for this analysis.

3 (c-d) Whole-tumour CCF of parental clone and largest subclones in *in-silico* tumours under  
4 Surface Growth and Volume Growth, respectively, under the indicated parameter conditions.  
5 “Parental (3p loss, *VHL*)” clone is shown along with up to five subclones with a whole-tumour  
6 CCF of 0.01 or higher. All remaining subclones are represented in the “other” group.

7

8 **Supplementary Figure 3.** Representative examples of spatial maps of subclones and  
9 fitness under various model conditions.

10 Implementations without or with necrosis are shown at top or bottom, respectively.  
11 Subclones are shown in randomly generated colours, while parental clone is shown in grey in  
12 spatial maps of subclones. Higher fitness values are reflected by greater intensities of purple.  
13 Driver acquisition probabilities in these representative simulations are  $p_{driver} = 2 \times 10^{-4}$ .

14

15 **Supplementary Figure 4.** Spatial features of tumour fitness in models with saturated  
16 driver advantages.

17 (a) Mean fitness of marginal-most (10%) of tumour voxels. (b) Mean fitness of central-most  
18 (10%) tumour voxels. (c) Ratio of the mean fitness of central-most (10%) tumour voxels to  
19 that of marginal-most (10%) tumour voxels (“Ratio\_C2M”). Panels (i)-(iii) in (a-c) reflect  
20 runs with varying driver acquisition probabilities. (d) Mean fitness of randomly sampled  
21 (10%) tumour voxels against the Ratio\_C2M. Data points in (d) reflect sets of simulations



1 with varying growth patterns (colour), driver acquisition rates (size), and implementation of  
2 necrosis (symbol). N = 50 simulations for each condition.

3

4 **Supplementary Figure 5.** Spatial features of tumour fitness in models with additive  
5 driver advantages.

6 (a) Mean fitness of marginal-most (10%) tumour voxels. (b) Mean fitness of central-most  
7 (10%) of tumour voxels. (c) Ratio of mean fitness of central-most (10%) tumour voxels to  
8 that of marginal-most (10%) tumour voxels (“Ratio\_C2M”). Panels (i)-(iii) in (a-c) reflect  
9 runs with varying driver acquisition probabilities. (d) Mean fitness of randomly sampled  
10 (10%) tumour voxels against the Ratio\_C2M. Data points in (d) reflect sets of simulations  
11 with varying growth patterns (colour), driver acquisition rates (size), and implementation of  
12 necrosis (symbol). N = 50 simulations for each condition.

13

14 **Supplementary Figure 6.** Quantile-Quantile (Q-Q) plots of observed distribution of  
15 microdiversity hotspots versus the fitted power law distribution.

16 From left to right represent Surface Growth Model, Volume Growth Model and experimental  
17 data, with conditions indicated within figures. “S” and “V” in the figure reflect Surface  
18 Growth and Volume Growth, respectively. “p=2e-4” reflects a driver acquisition probability  
19 of 2e-4. In addition, the median fitted power law exponent  $k$ , as in  $P(D \leq d) \sim d^k$ , from  
20 bootstrapping (in **Main Figure 3f-g**) is indicated within figures.

21

22

1 **Supplementary Figure 7.** Association between spatial features of microdiveristy and  
2 clinical behaviour.

3 (a-b) Cumulative probability distribution,  $P(D \leq d)$ , of the normalised distance to tumour  
4 centre in ccRCC tumours, split into subsets according to either relapse status (a) or rates of  
5 disease progression (b). 606 patient tumour (PT) regions from 54 ccRCC tumours are  
6 considered for this analysis (“complete.set”). Subsets with different relapse statuses consist of  
7 270 (“relapse”) and 336 regions (“no.relapse”), respectively. Subsets with different rates of  
8 disease progression consist of 276 (“no.progression”), 265 (“attenuated.progression”), and 65  
9 regions (“rapid.progression”), respectively.

10 (c-d) Bootstrapped power law exponent  $k$ , as in  $P(D \leq d) \sim d^k$ , fitted to cumulative probability  
11 distribution of normalised distance to tumour centre in each of bootstrap samples, in subsets of  
12 RCC tumours.

13 (e) Quantile-Quantile (Q-Q) plots of observed versus fitted distributions of microdiversity  
14 hotspots in subsets of RCC tumours.

15 Statistical annotations in (c-d) reflect two-sided Wilcoxon tests: “\*\*\*\*\*” indicates  $P \leq$   
16 0.0001.

17

18 **Supplementary Figure 8.** Photograph and histological images of representative case  
19 K156.

20 Photograph of the ex-vivo tumour (top left) and histological images of regional biopsies  
21 (R21, R36, R37, and R38) are presented.

22

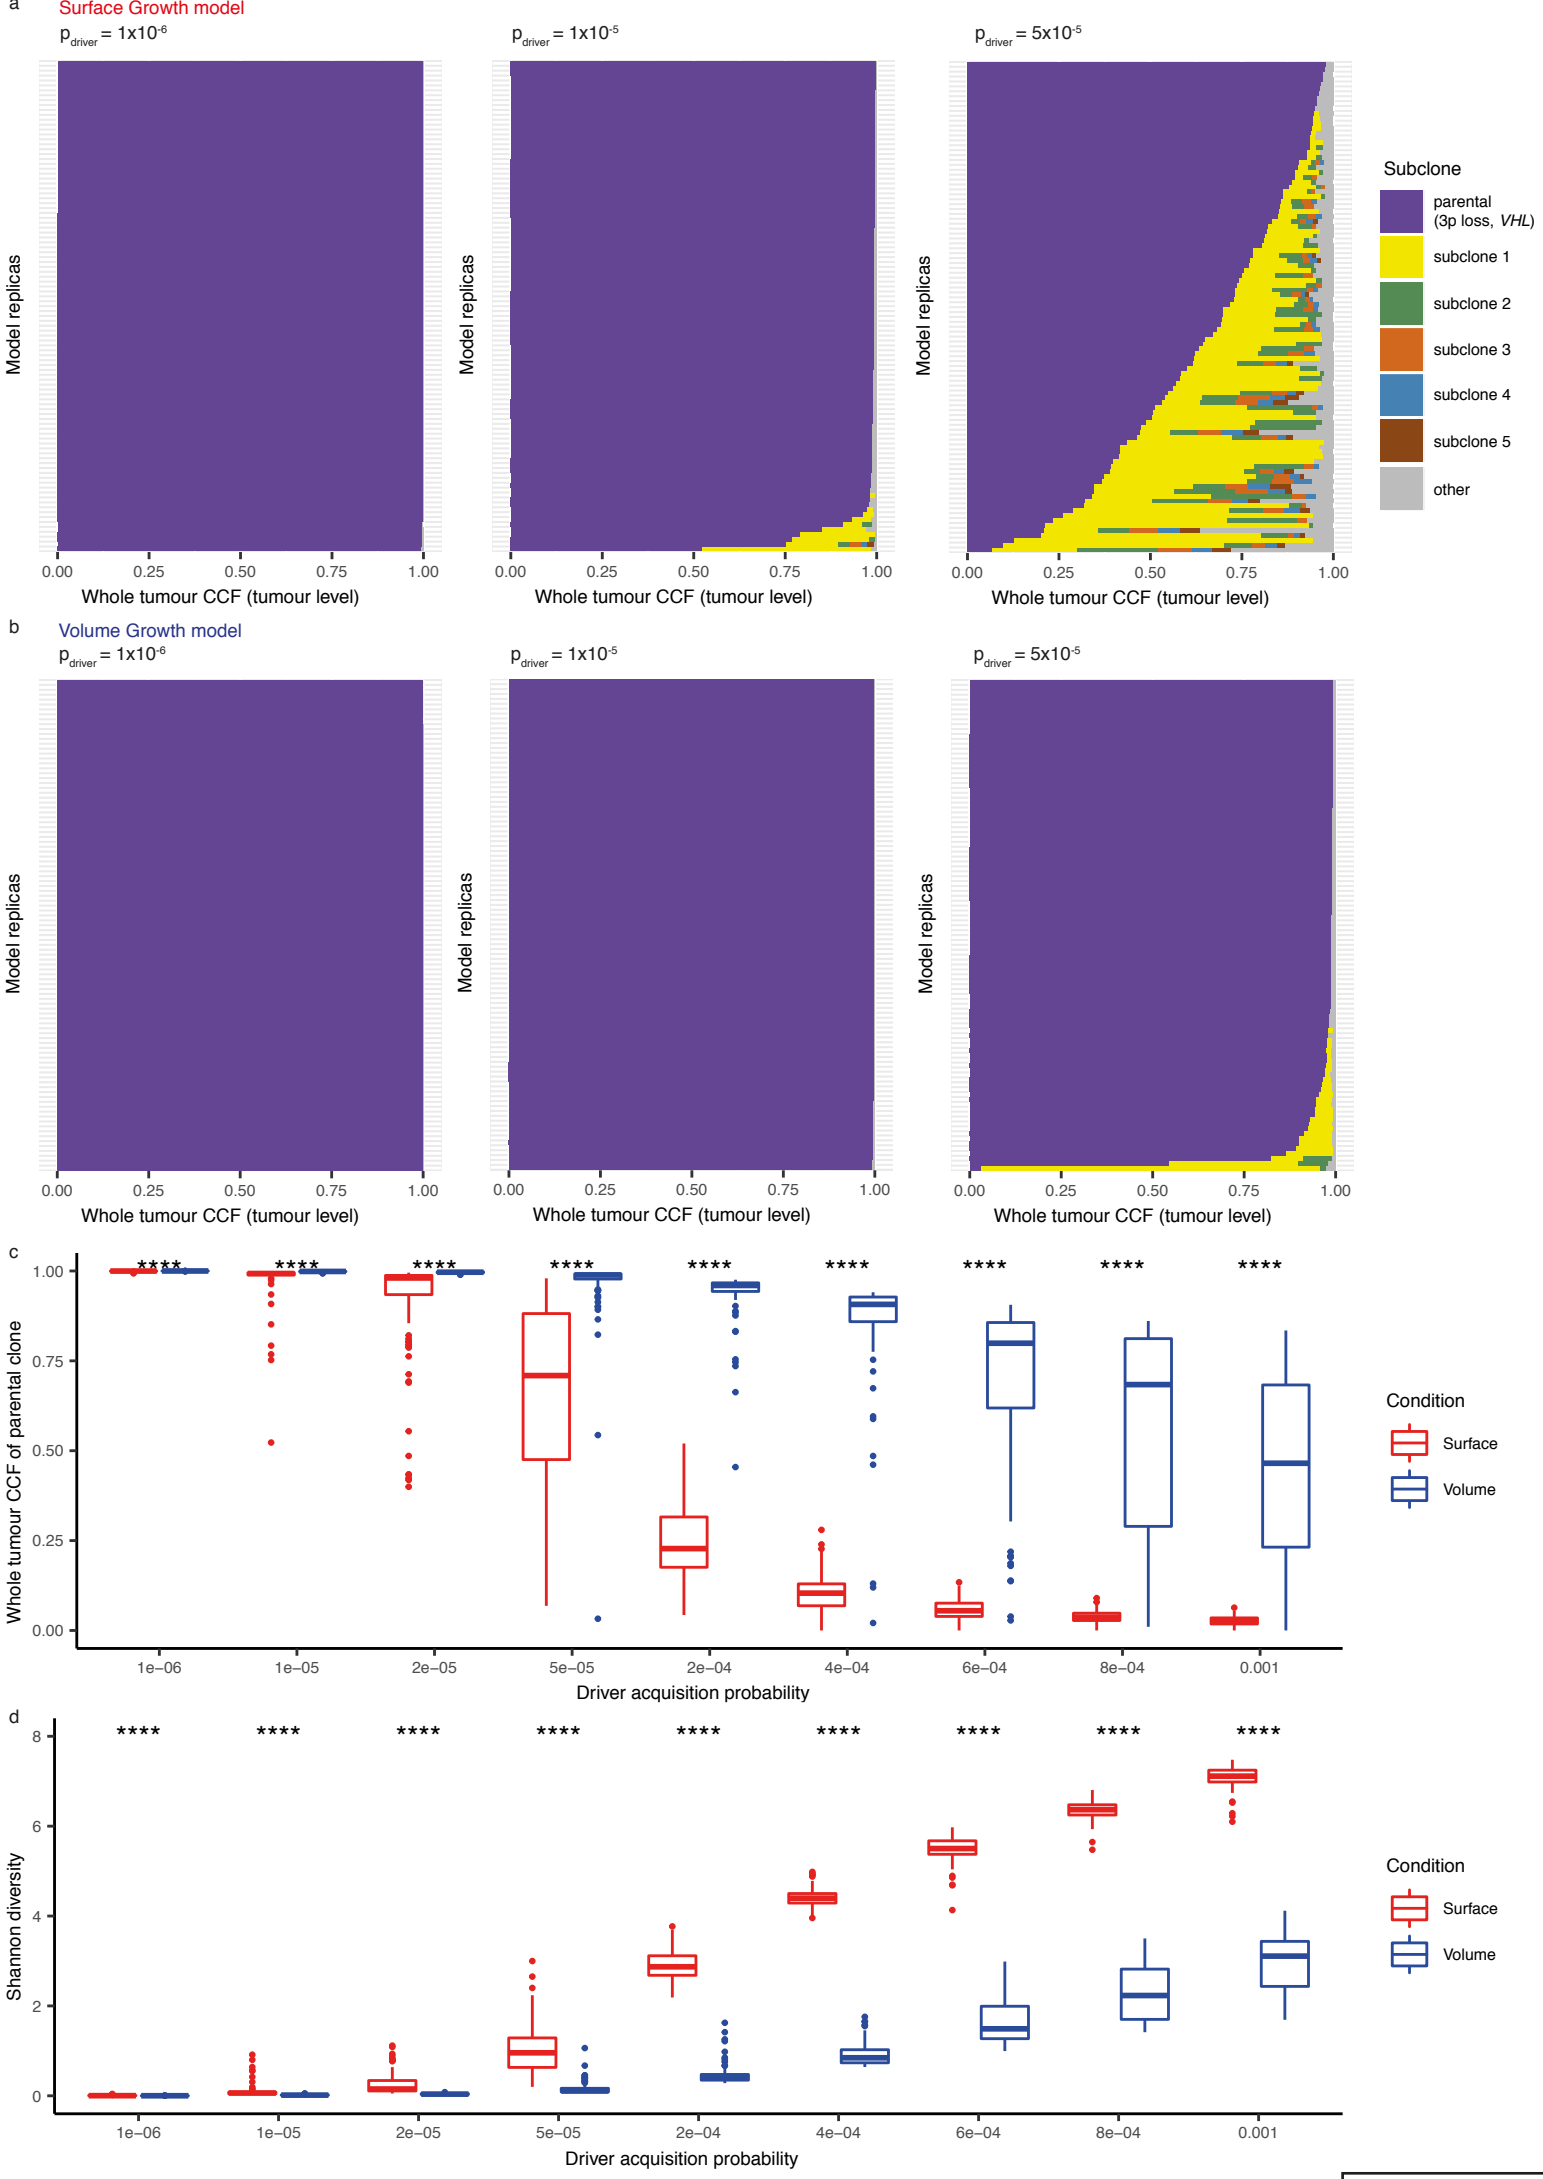

Supplemental Figure 1

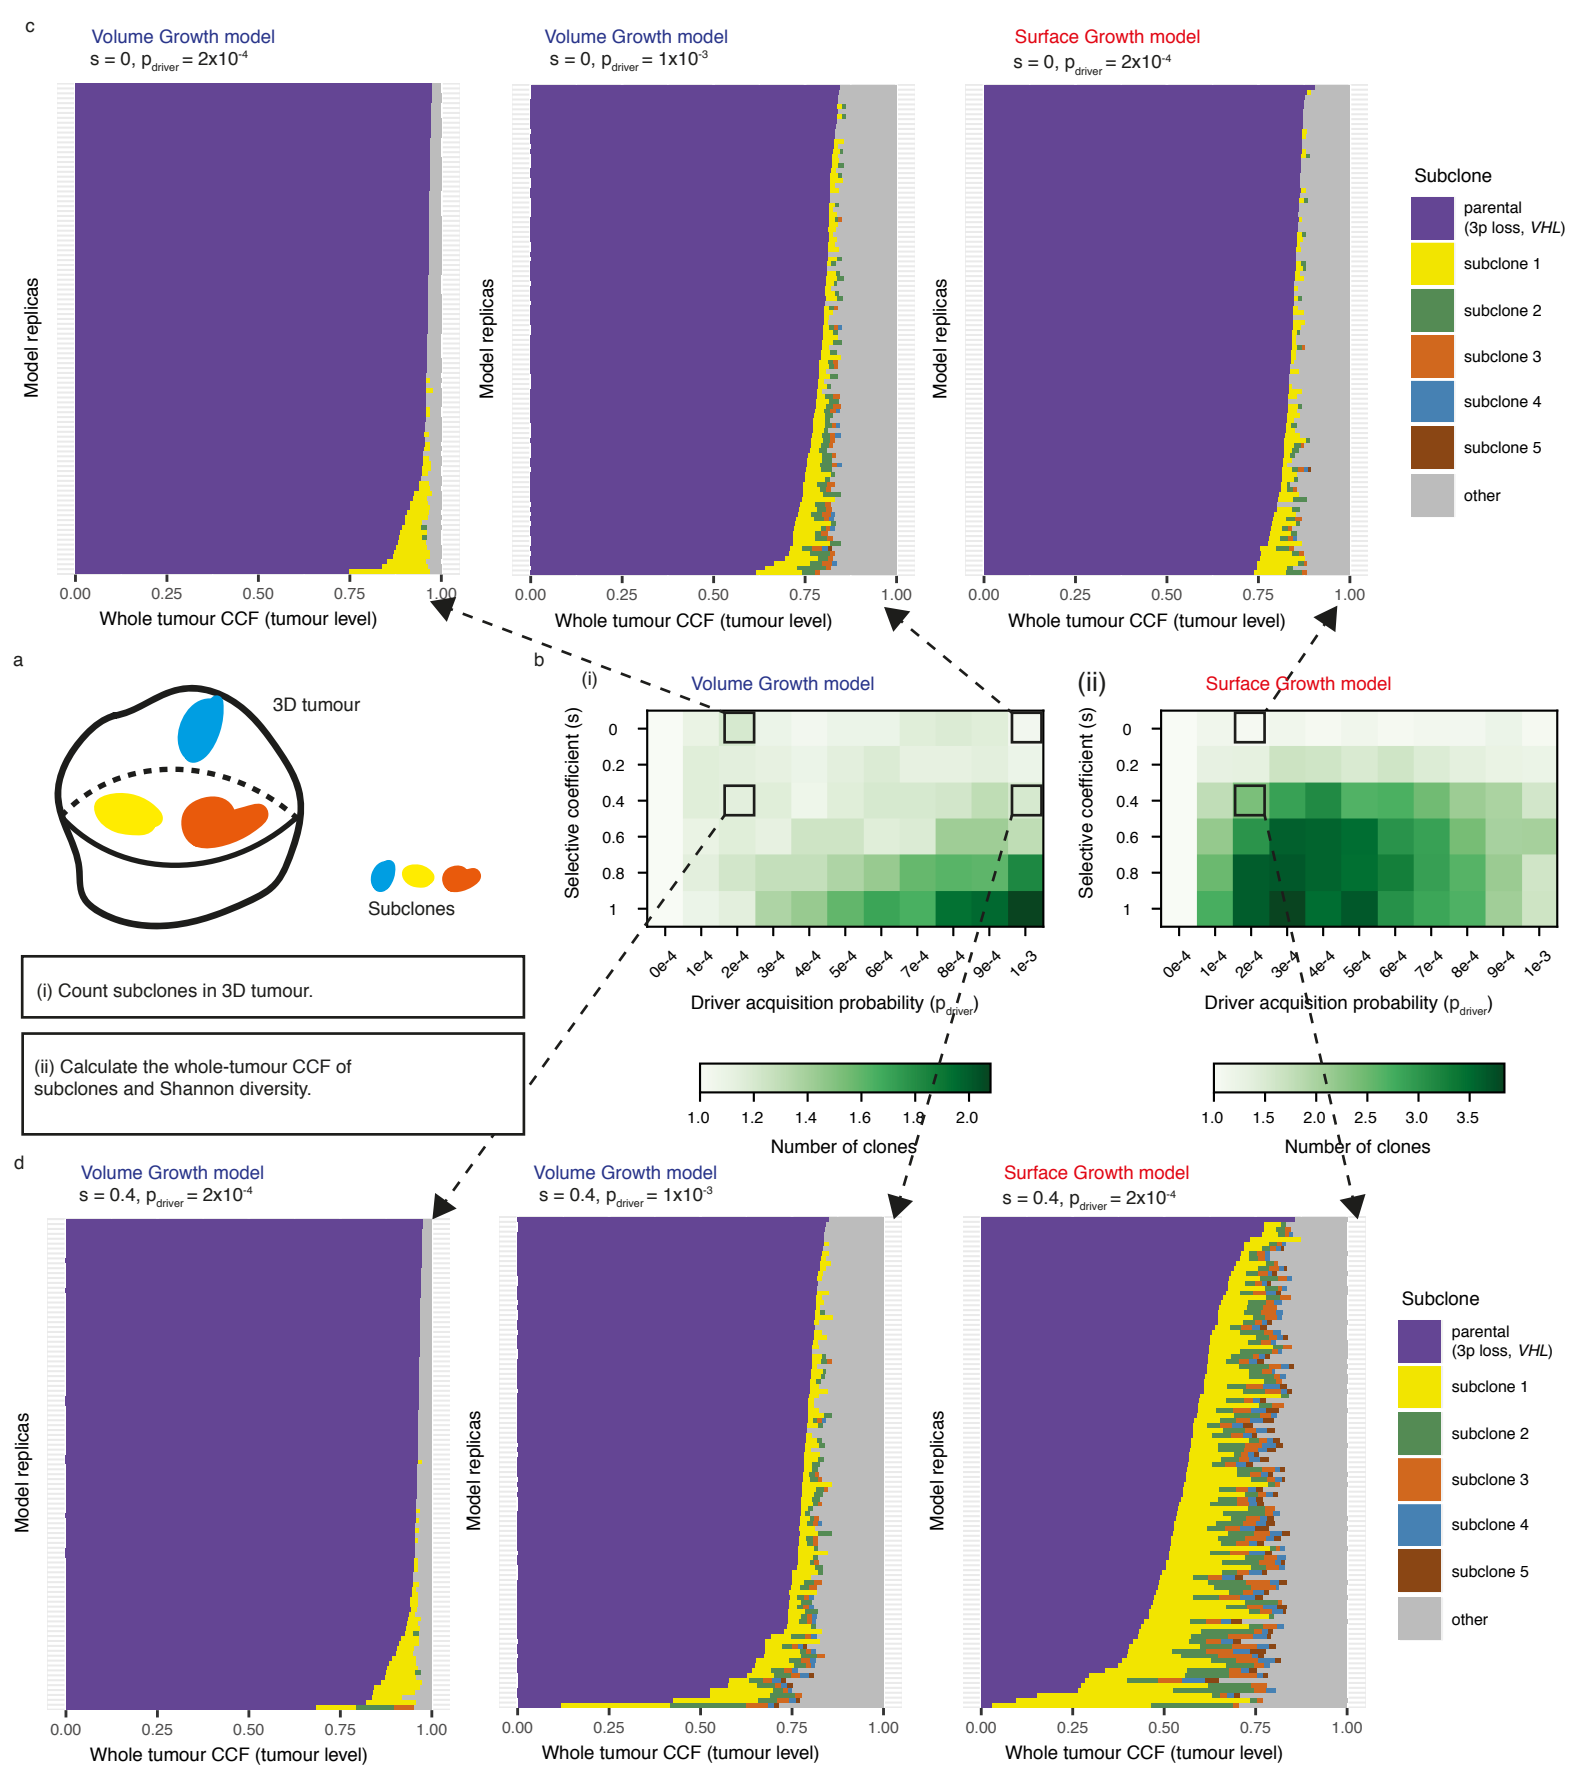

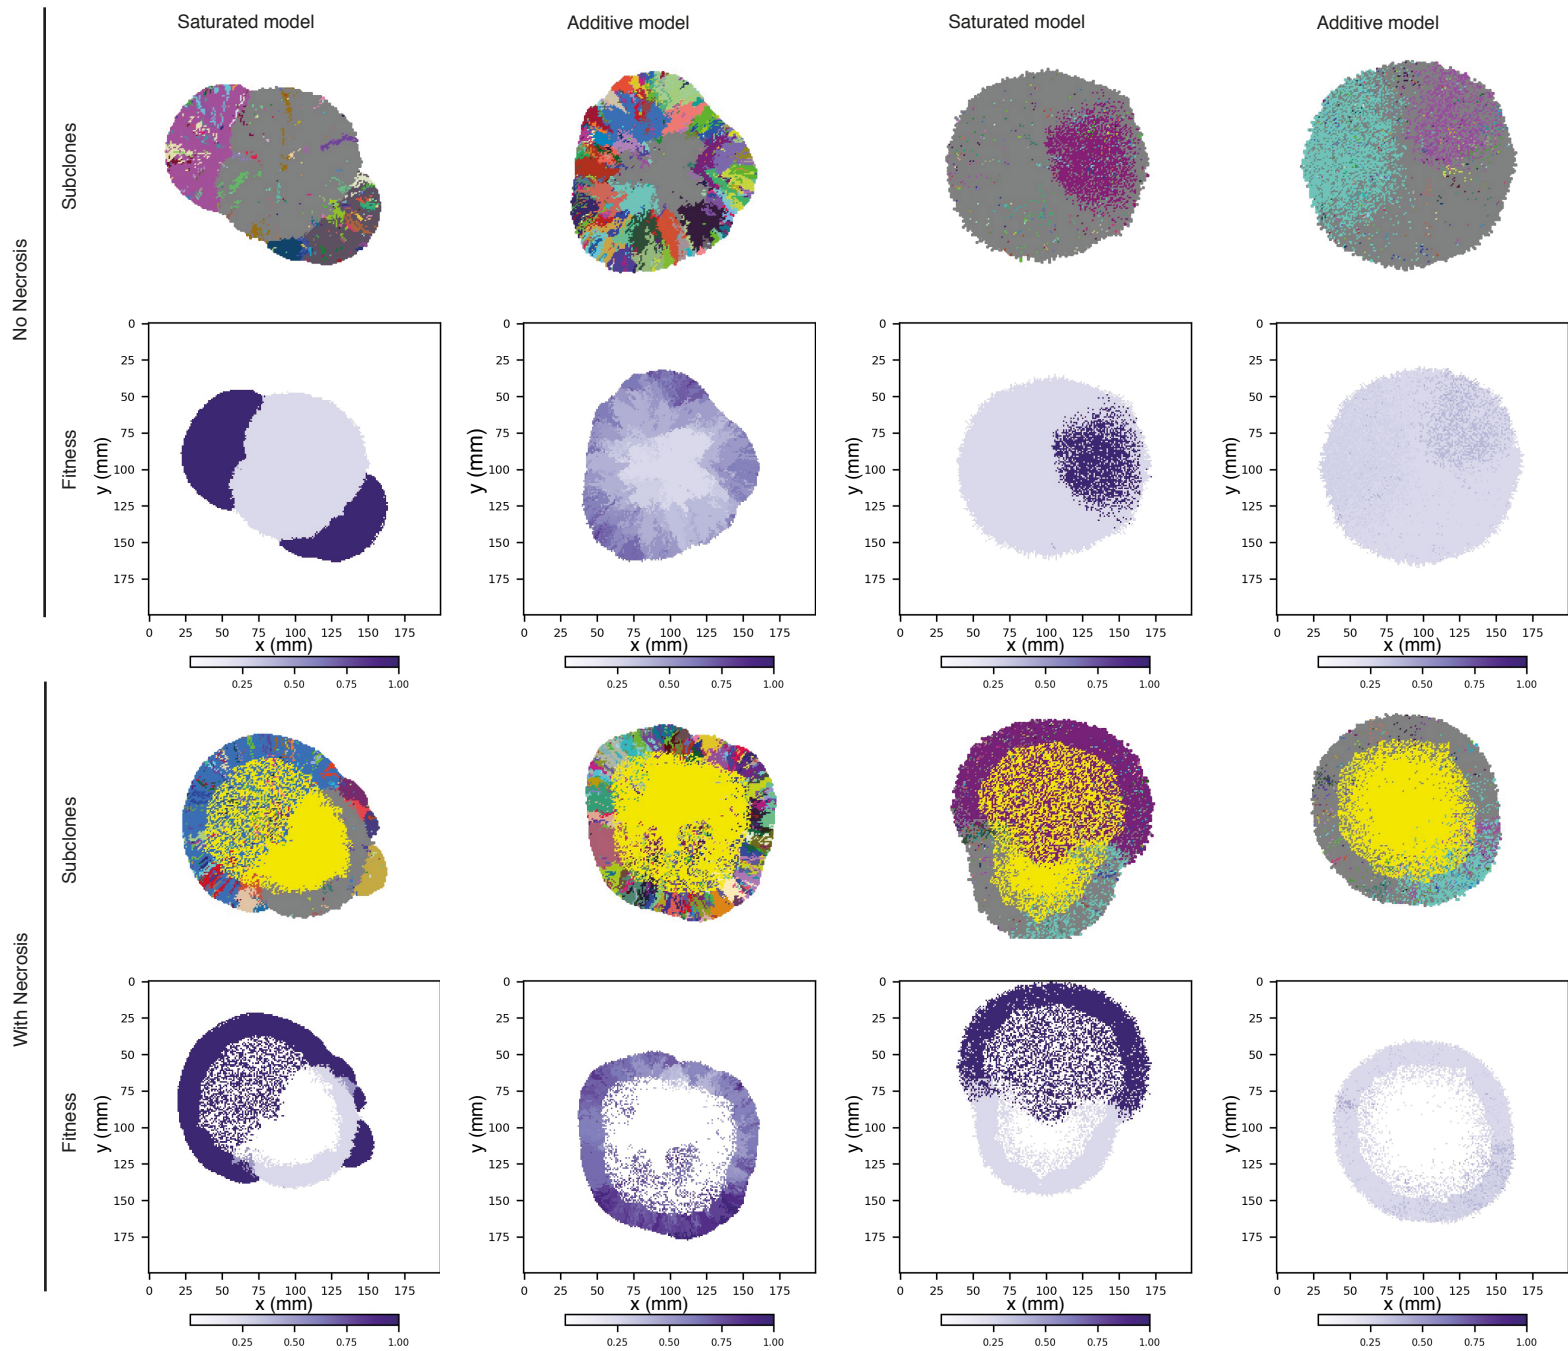

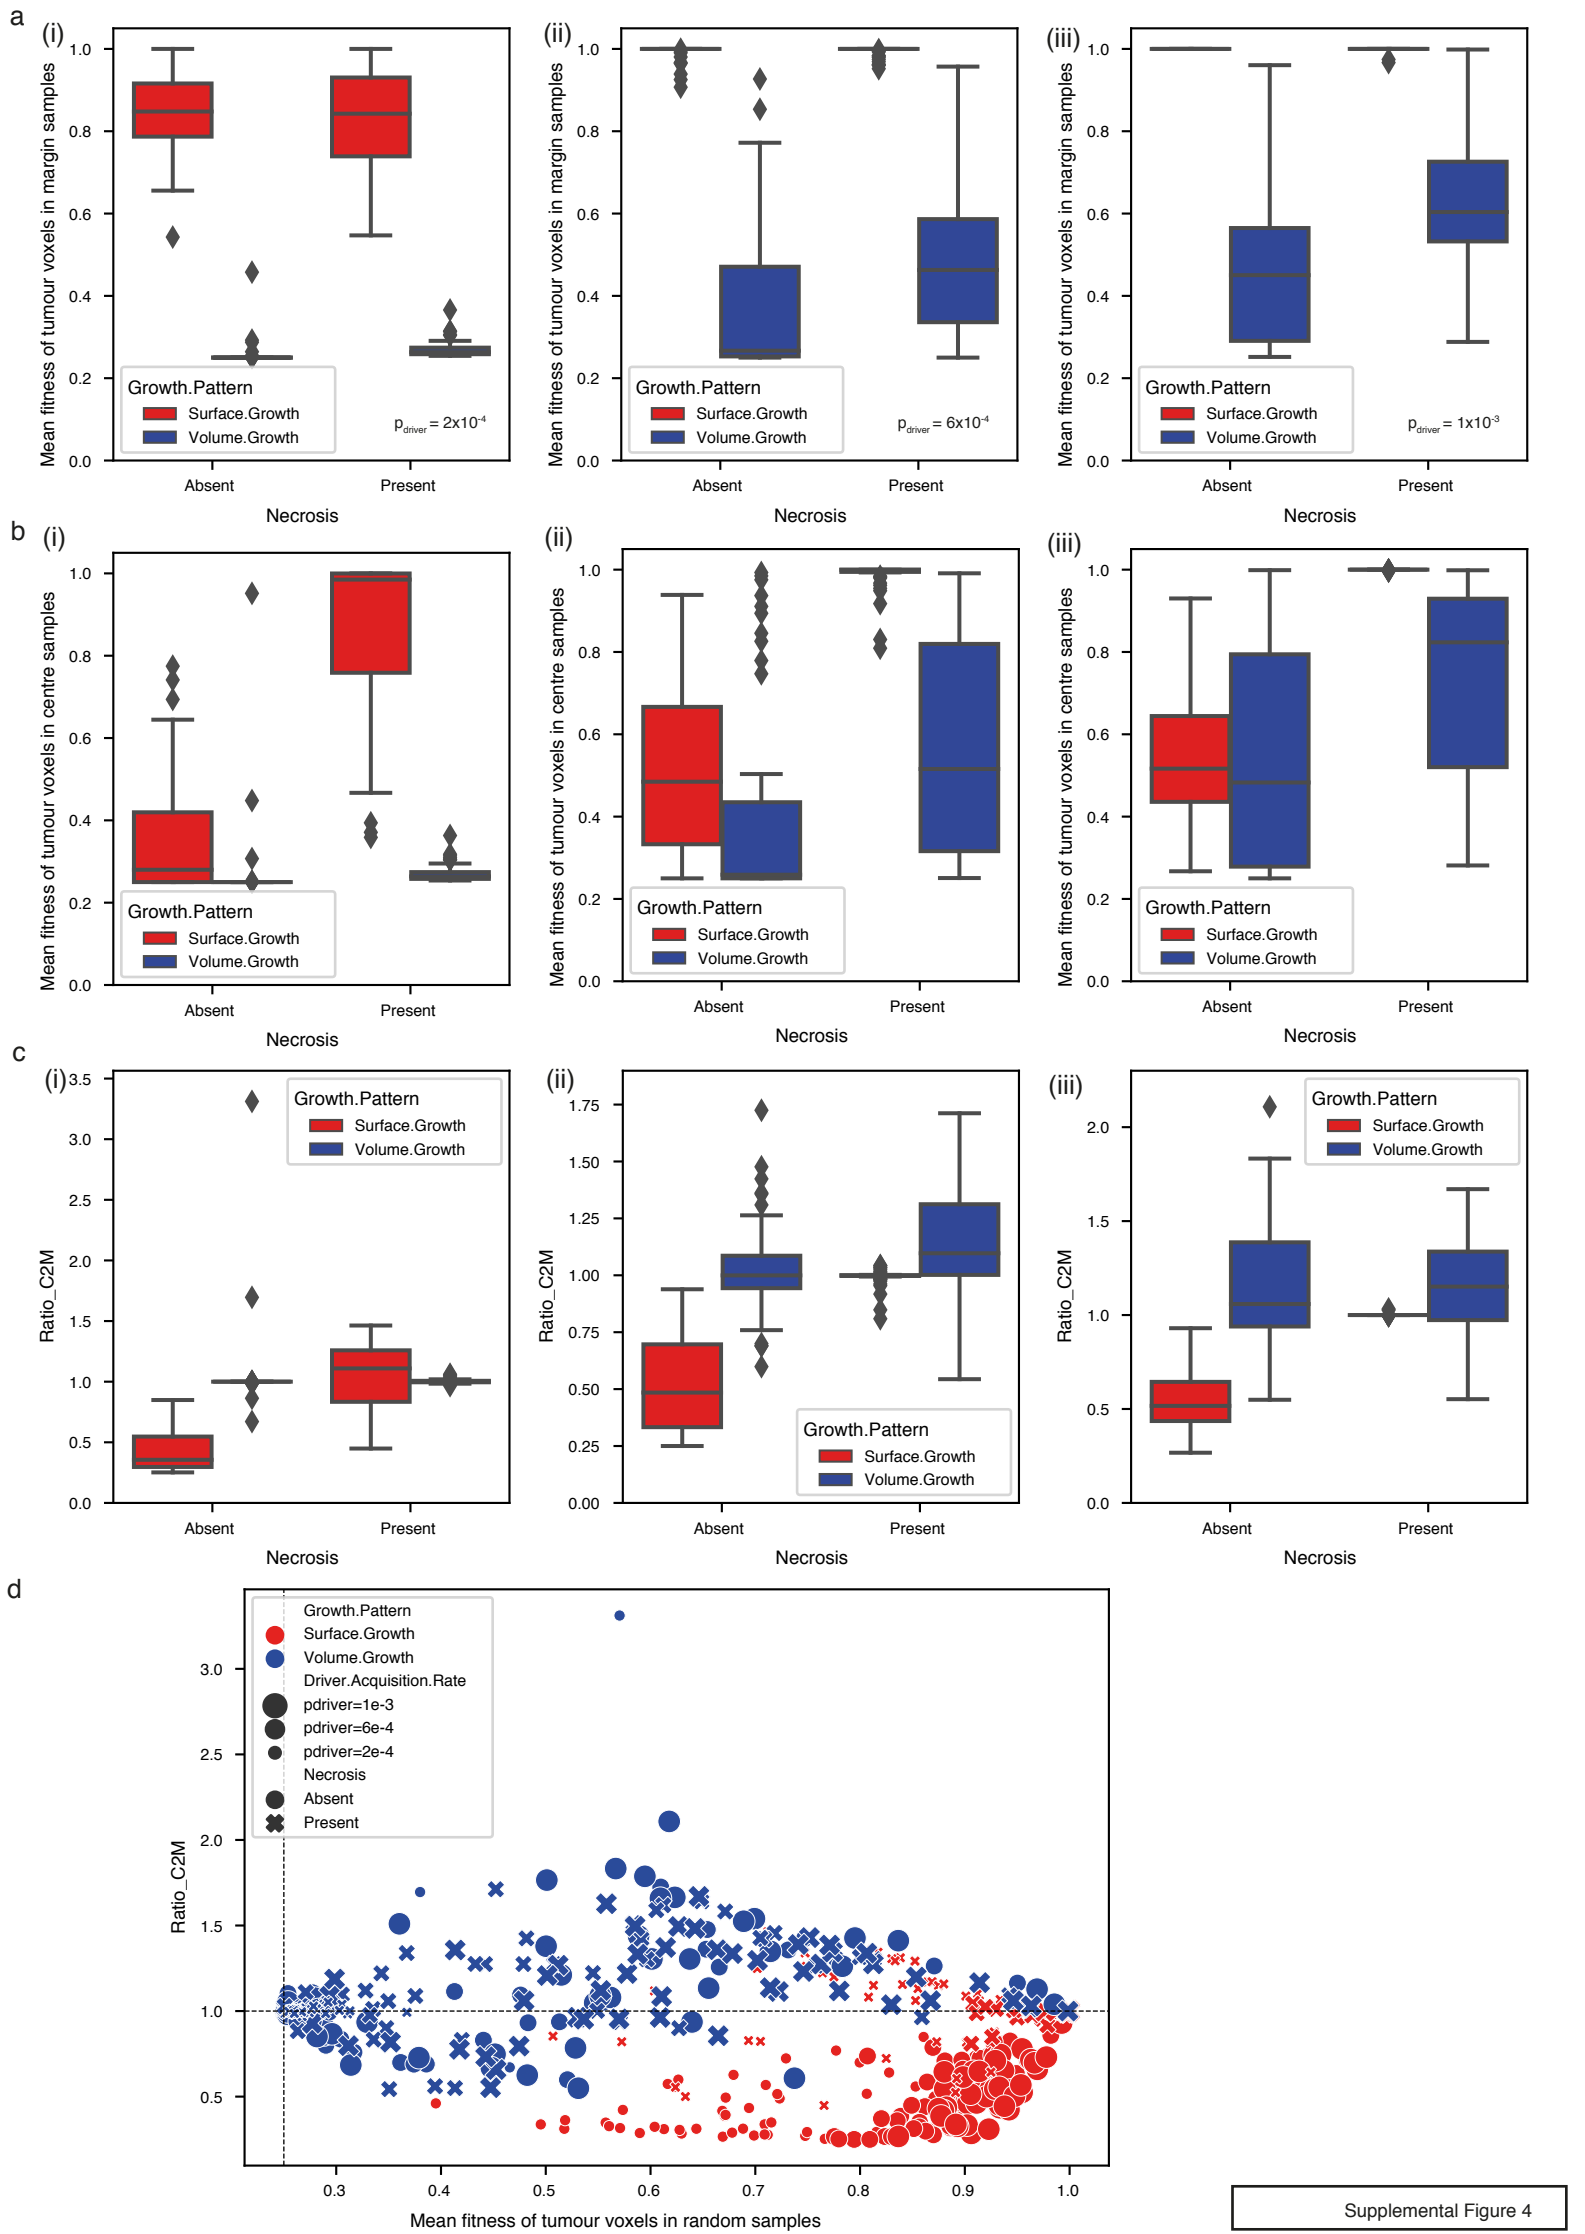

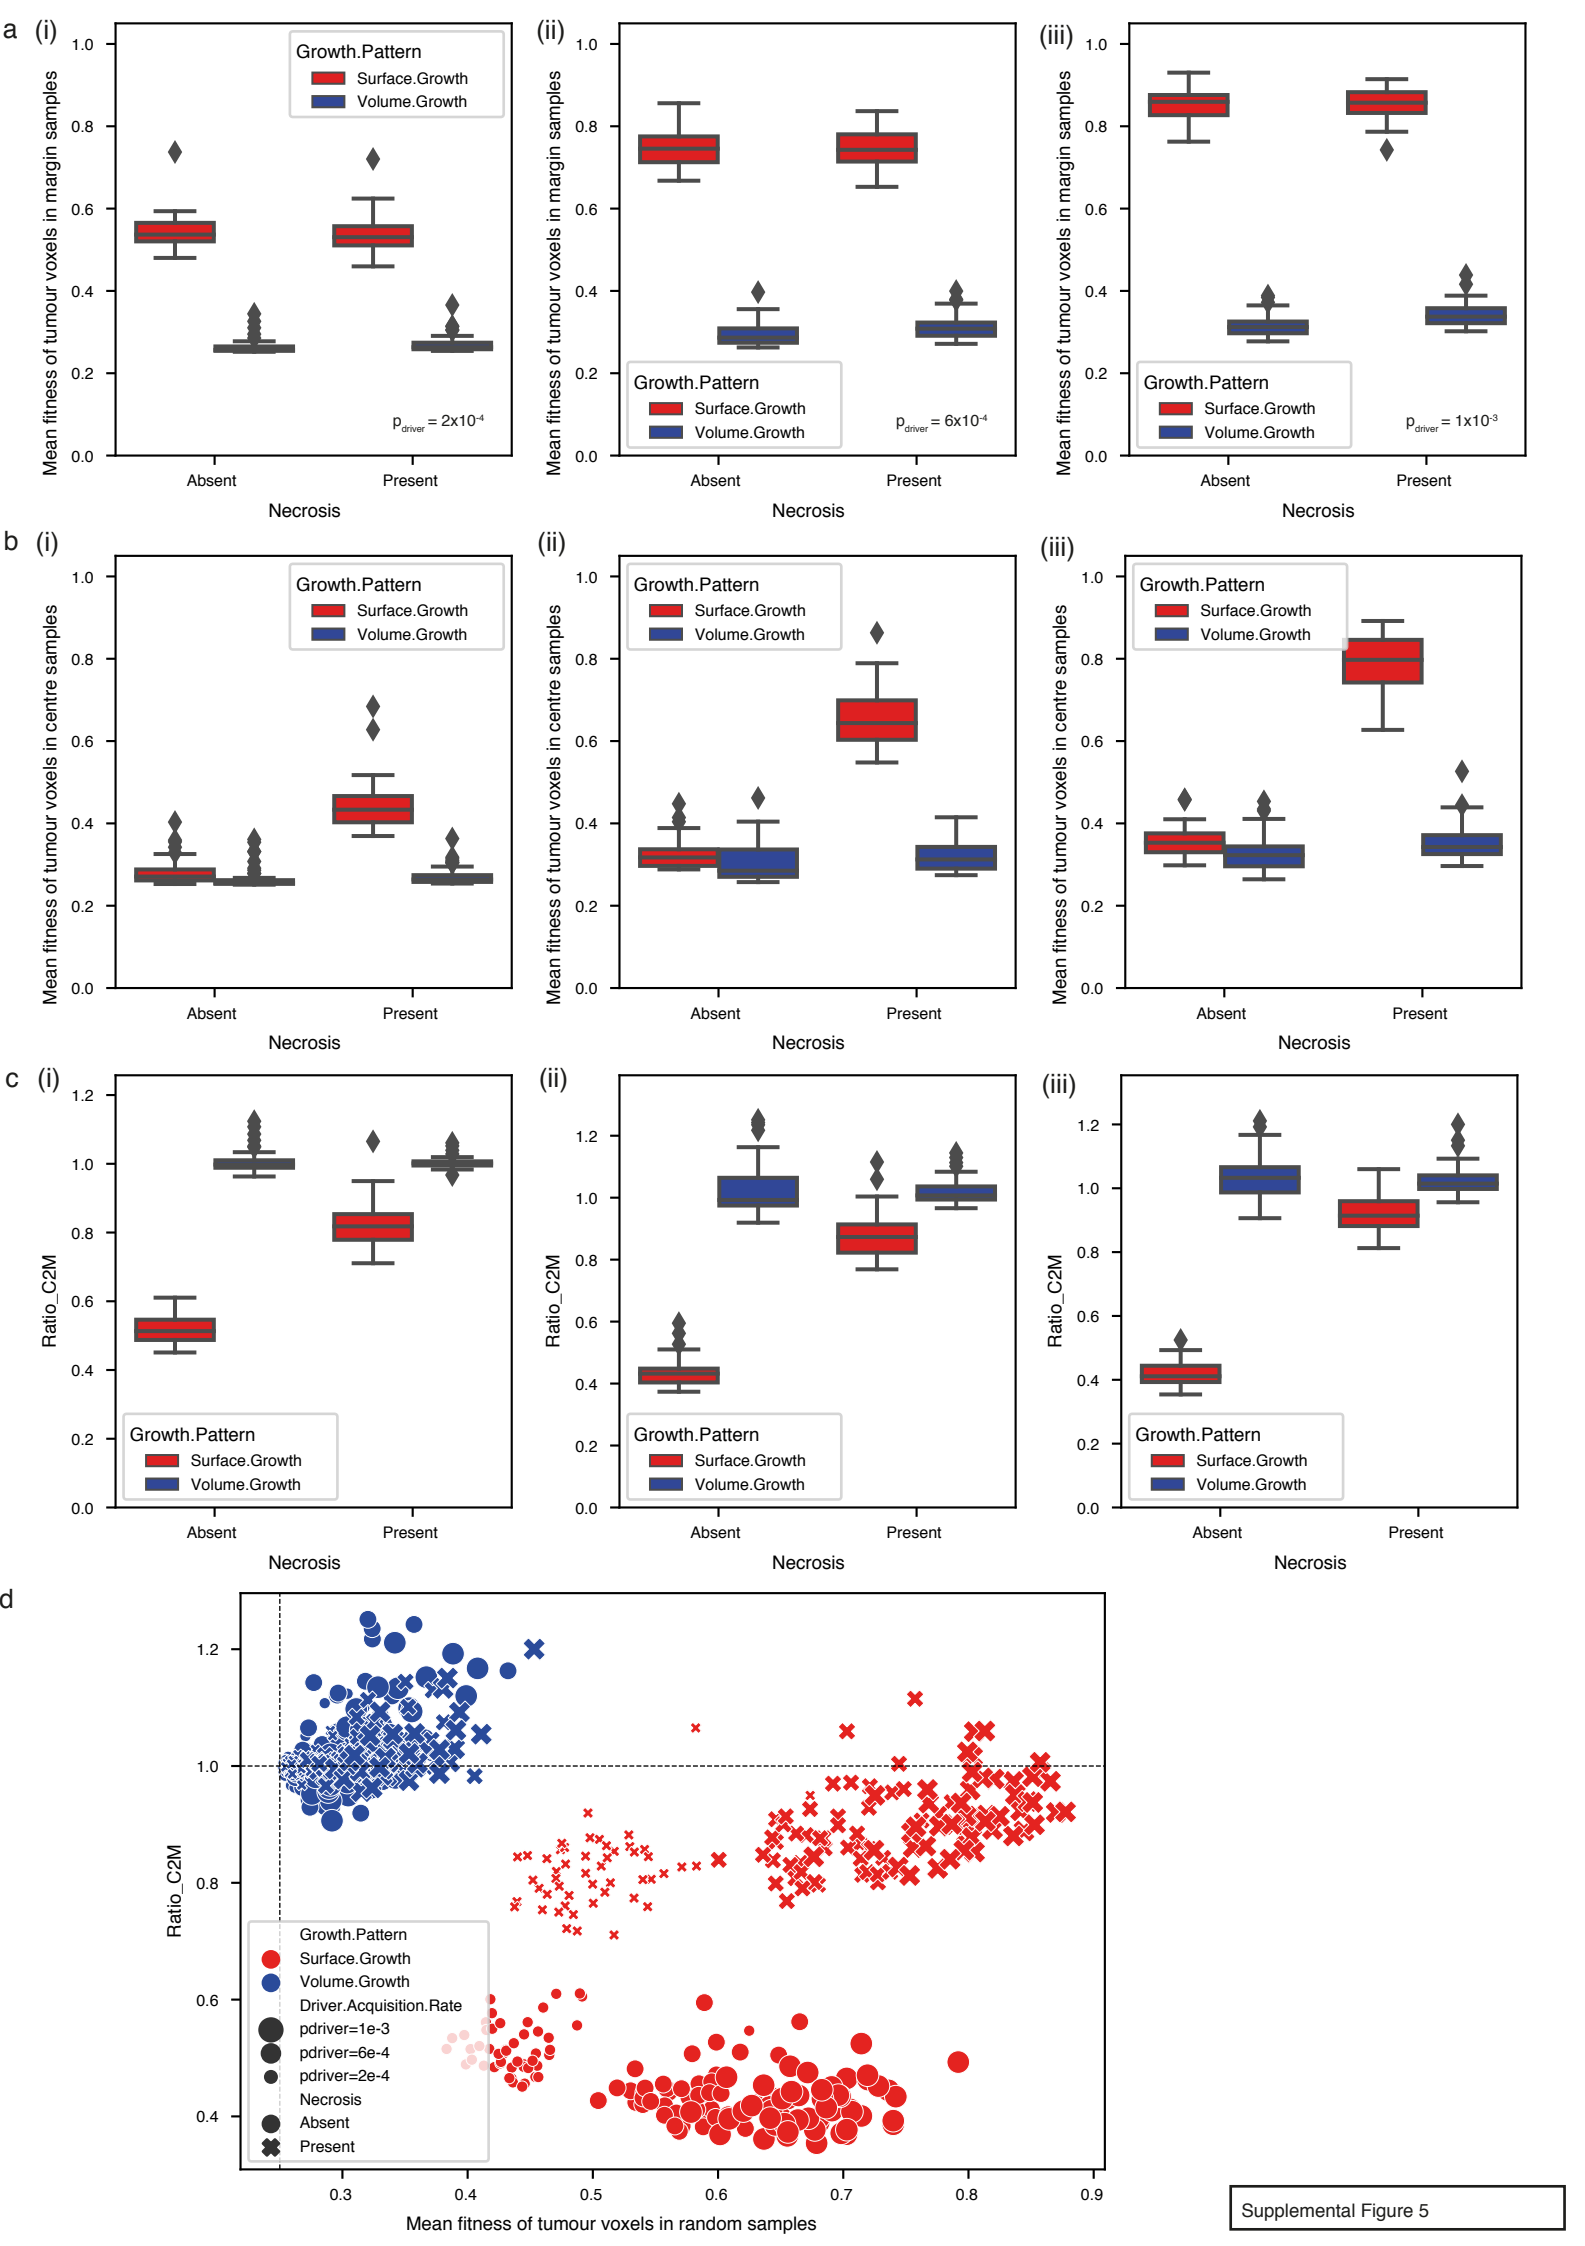

Surface Growth model

Volume Growth model

RCC

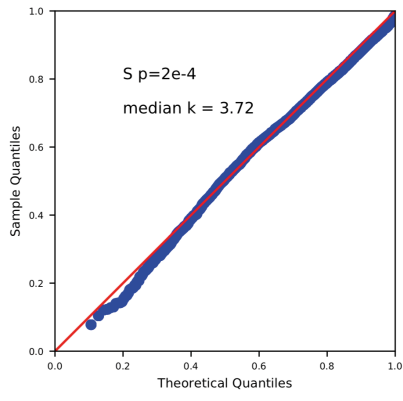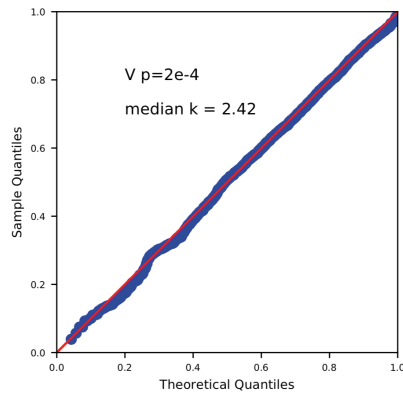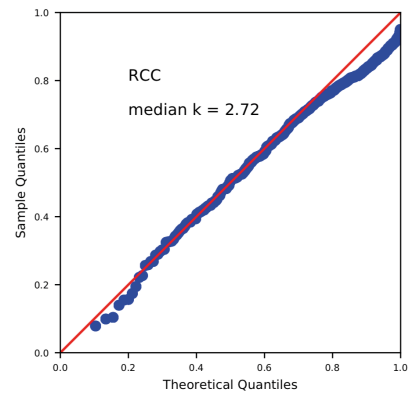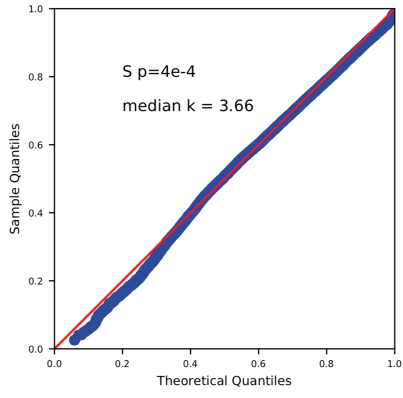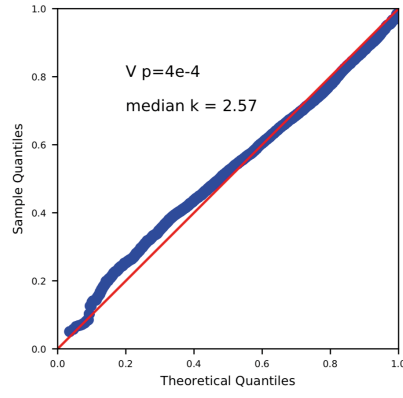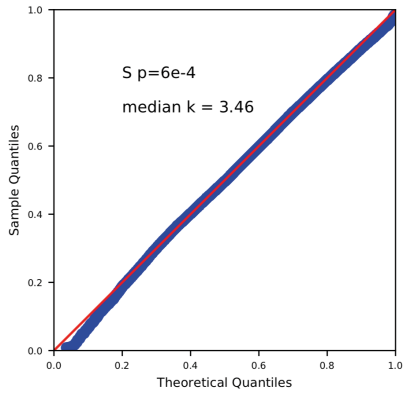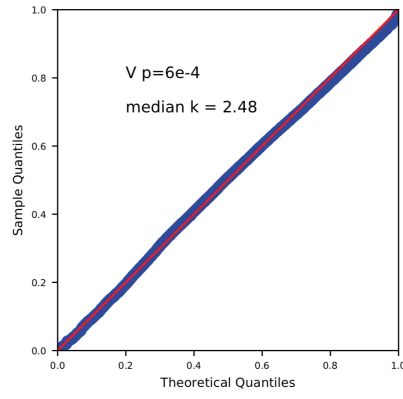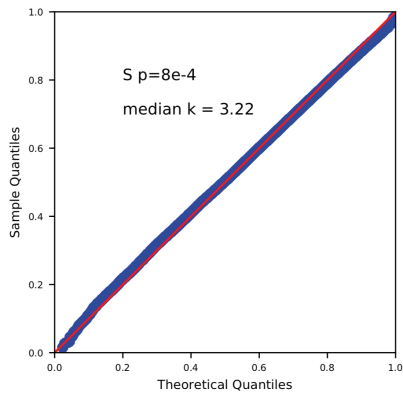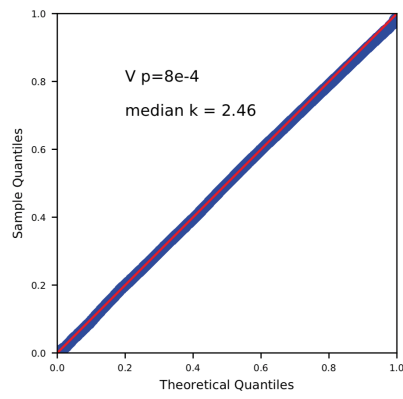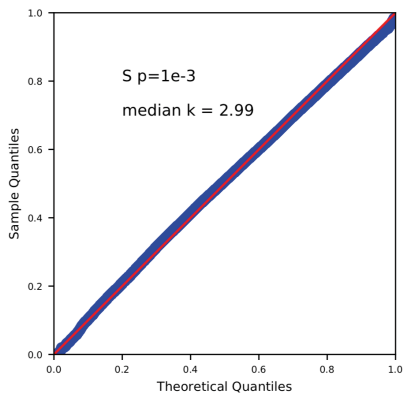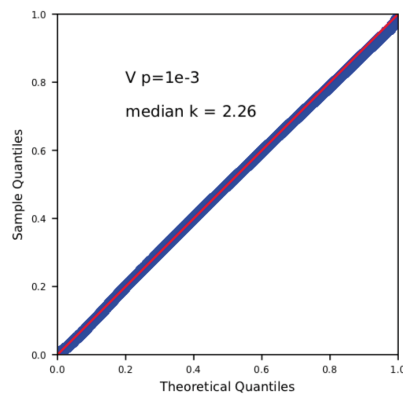



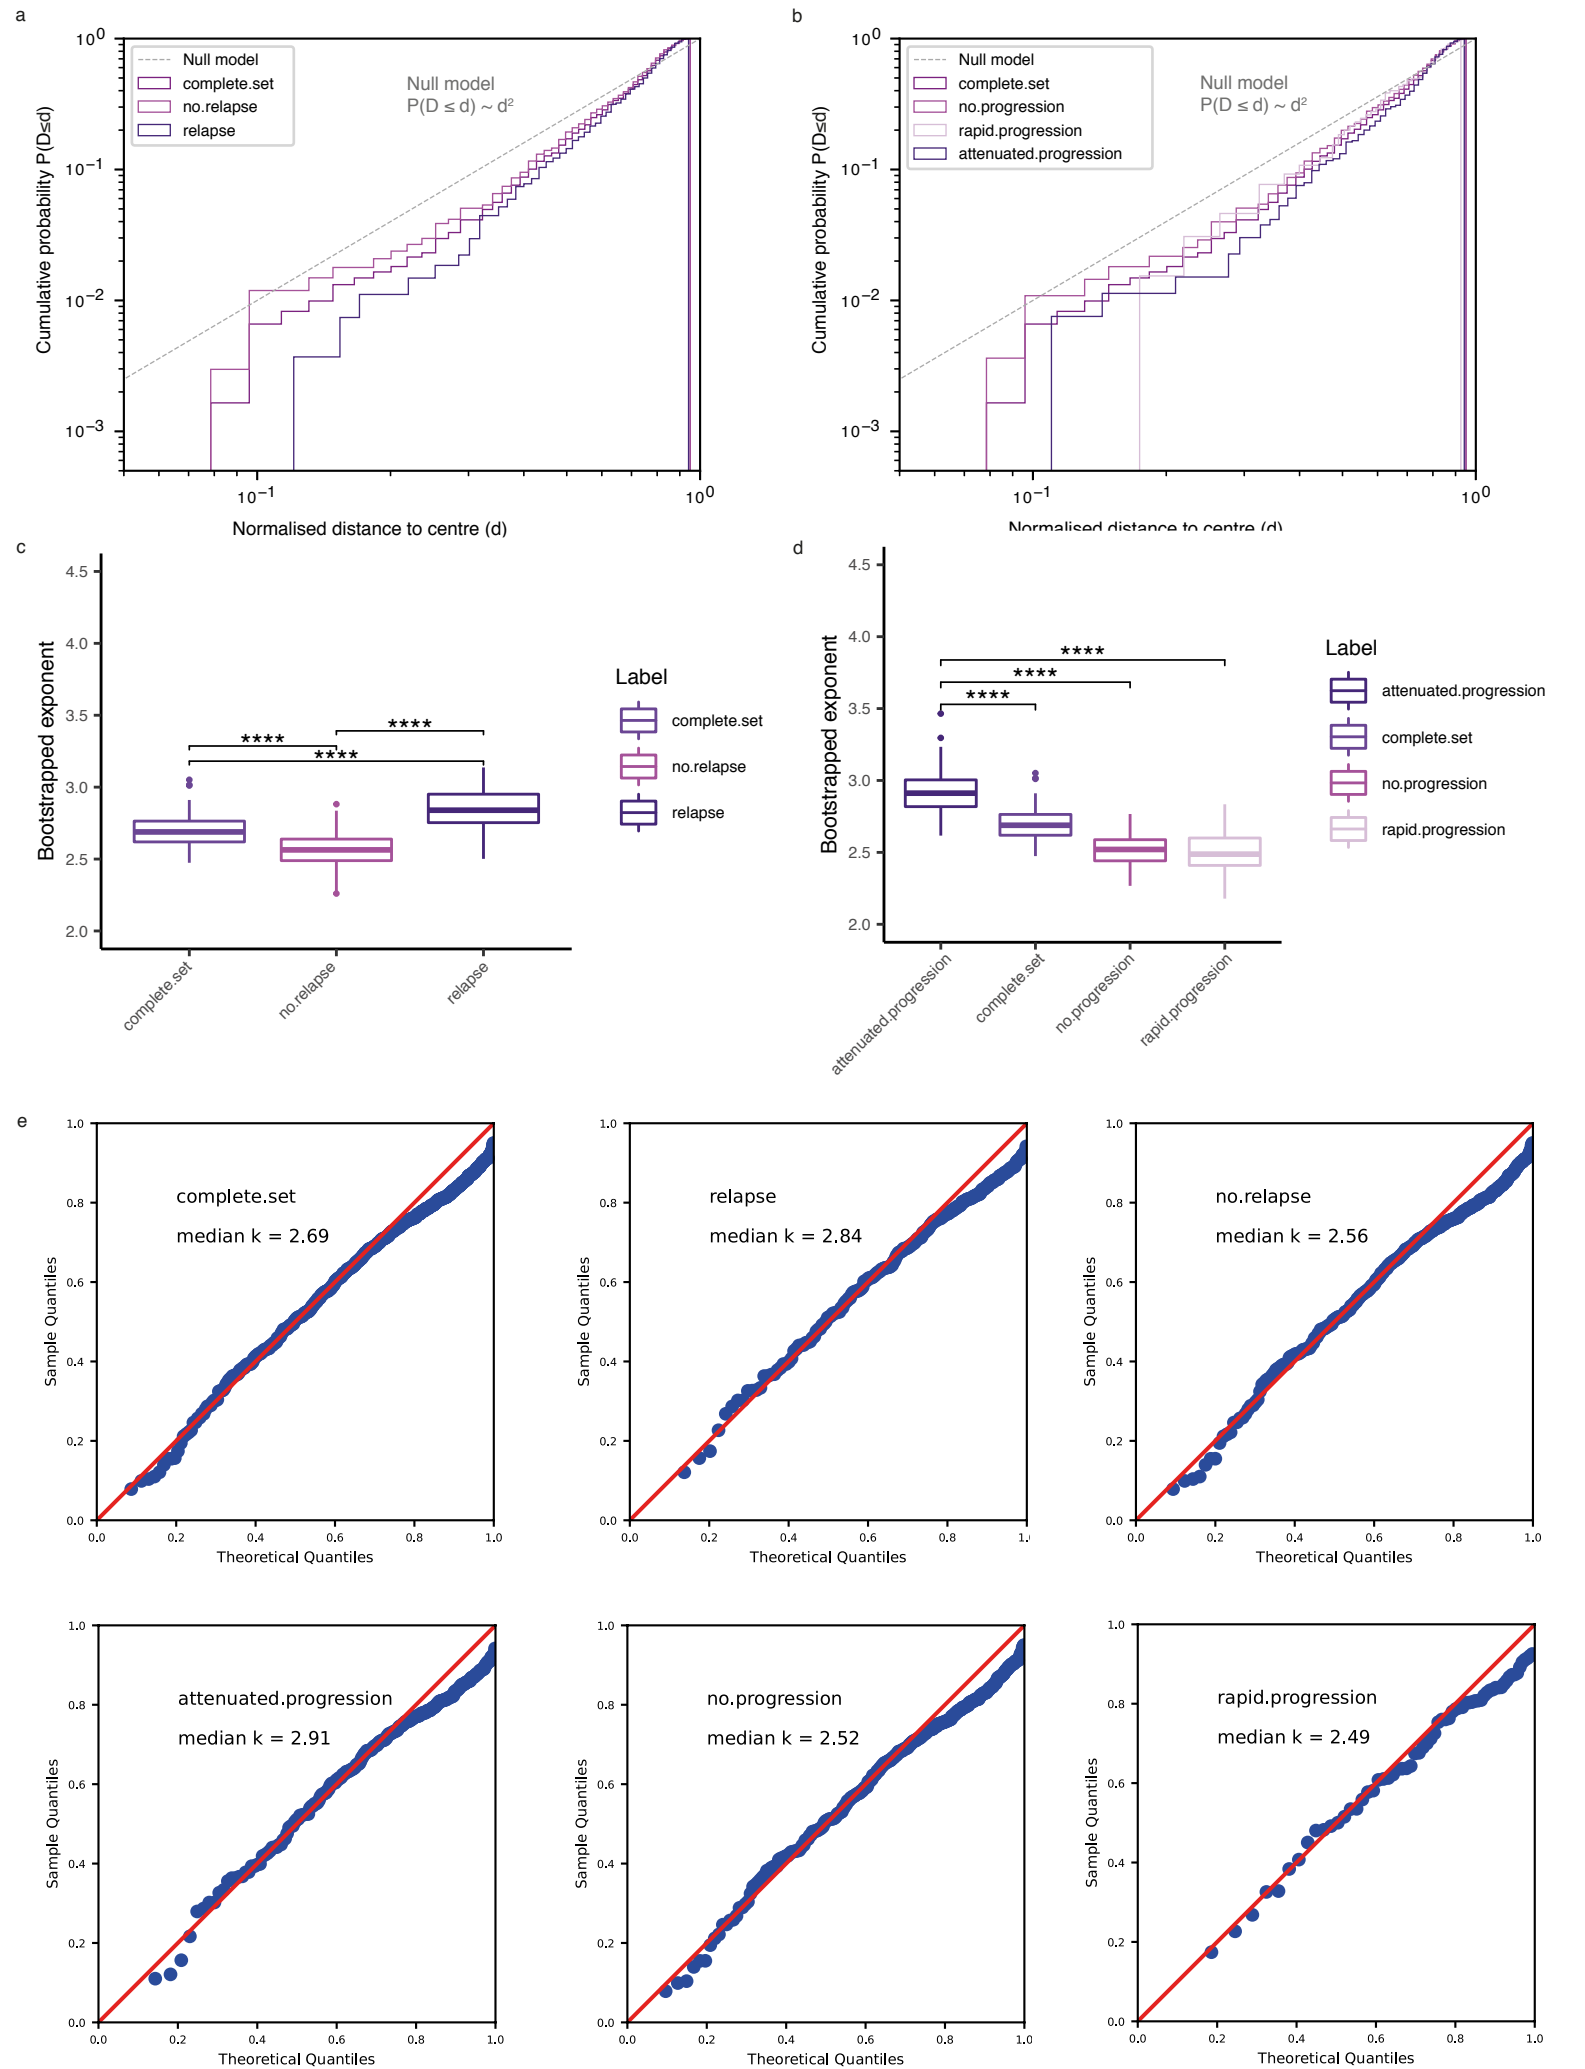

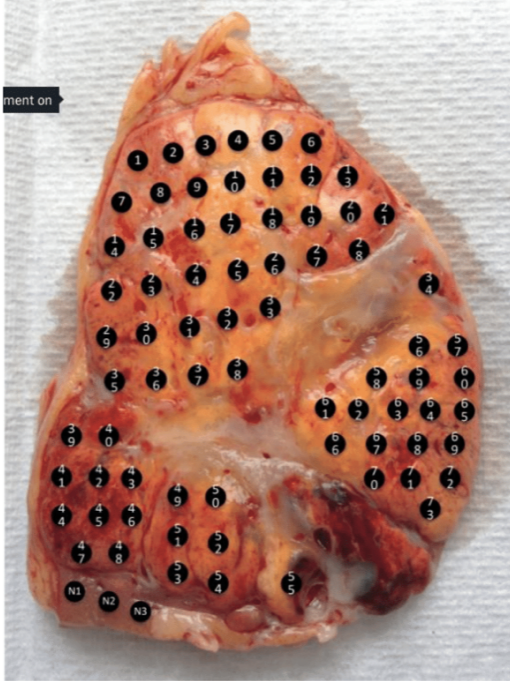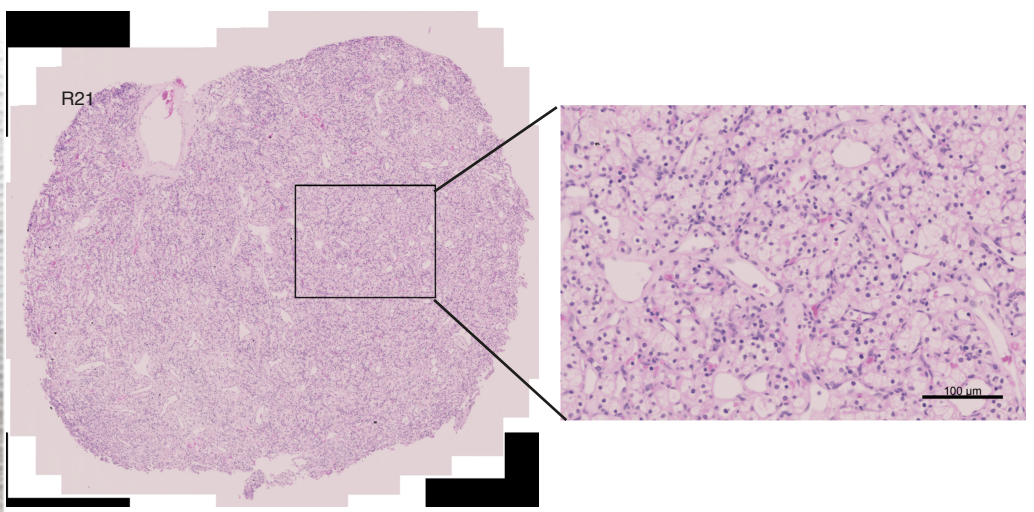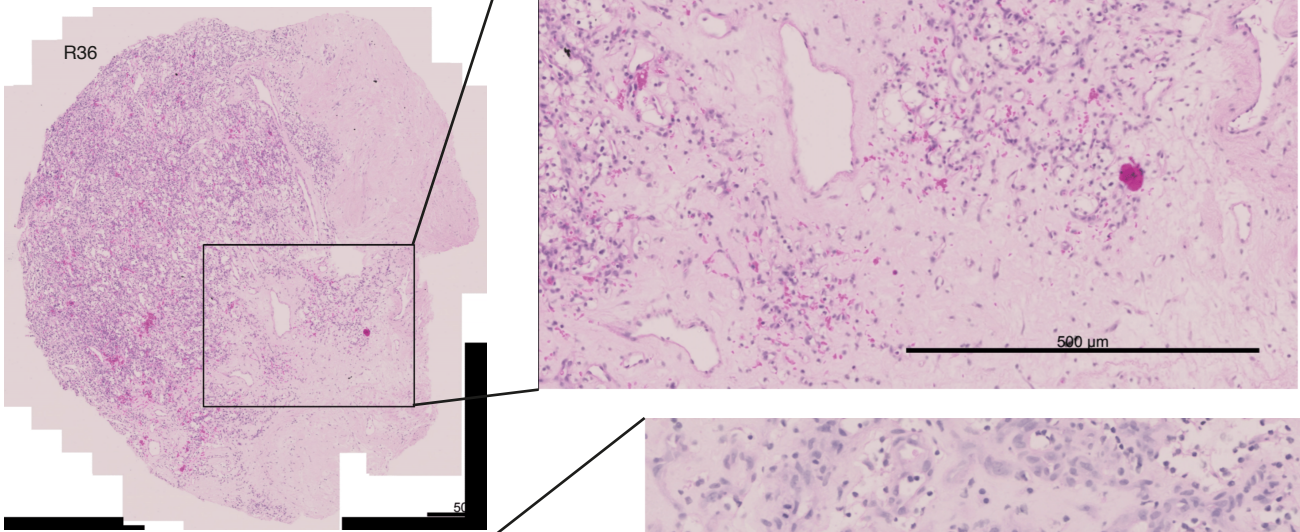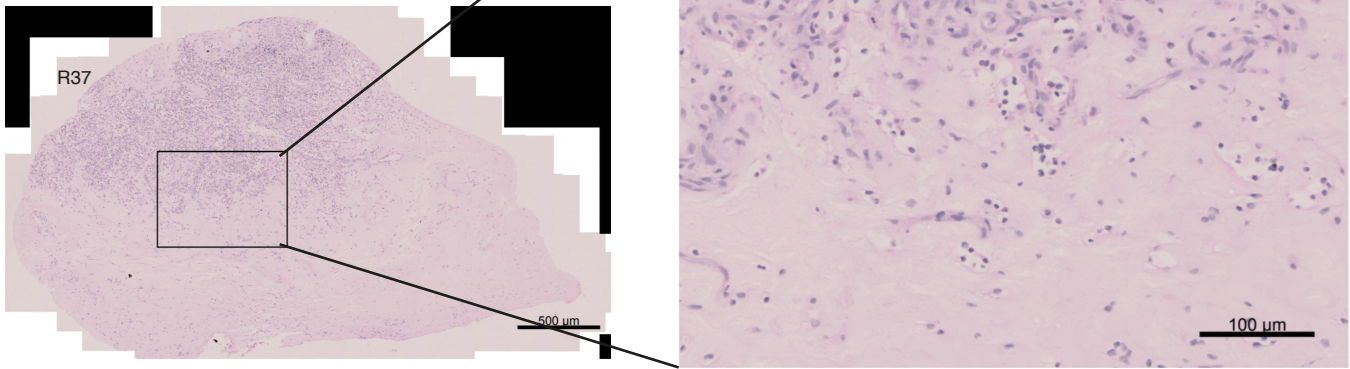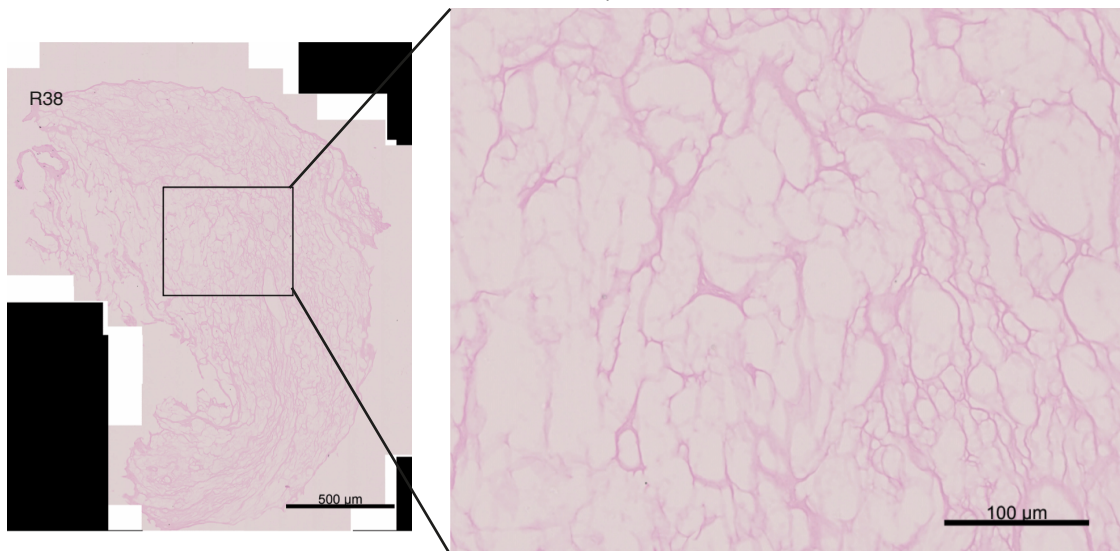

Supplement: 41559_2021_1586_MOESM1_ESM.pdf [file 41559_2021_1586_MOESM1_ESM.pdf]
